# Supplementary material for: A small molecule inhibitor of PTP1B and PTPN2 enhances T cell anti-tumor immunity
Source: Nat Commun. 2023 Jul 27;14:4524. doi: 10.1038/s41467-023-40170-8 (PMC10374545; doi:10.1038/s41467-023-40170-8)
Supplement: Supplementary file 1 — Supplementary Information [file 41467_2023_40170_MOESM1_ESM.pdf]

## SUPPLEMENTAL DATA

### *A small molecule inhibitor of PTP1B and PTPN2 enhances T cell anti-tumor immunity*

Shuwei Liang <sup>1,2#</sup>, Eric Tran <sup>3#</sup>, Xin Du <sup>1,2</sup>, Jiajun Dong <sup>4</sup>, Harrison Sudholz <sup>1,2</sup>, Hao Chen <sup>6,7</sup>, Zihan Qu <sup>5</sup>, Nicholas D., Huntington <sup>1,2</sup>, Jeffrey J. Babon <sup>6,7</sup>, Nadia J. Kershaw <sup>6,7</sup>, Zhong-Yin Zhang <sup>4,5</sup>, Jonathan B. Baell <sup>3,8</sup>, Florian Wiede <sup>1,2\*</sup>, and Tony Tiganis <sup>1,2\*</sup>

<sup>1</sup> Monash Biomedicine Discovery Institute, Monash University, Clayton, Victoria 3800.

<sup>2</sup> Department of Biochemistry and Molecular Biology, Monash University, Clayton, Victoria 3800, Australia.

<sup>3</sup> Monash Institute of Pharmaceutical Sciences, Monash University, Parkville, Victoria 3052, Australia.

<sup>4</sup> Department of Medicinal Chemistry and Molecular Pharmacology, Purdue University, West Lafayette, IN 47907, USA,

<sup>5</sup> Department of Chemistry, Purdue University, West Lafayette, IN 47907, USA,

<sup>6</sup> Walter and Eliza Hall Institute of Medical Research, Parkville, Victoria 3052, Australia.

<sup>7</sup> Department of Medical Biology, The University of Melbourne, Victoria 3052, Australia.

<sup>8</sup> Lyterian Therapeutics, South San Francisco, California 94080, United States of America.

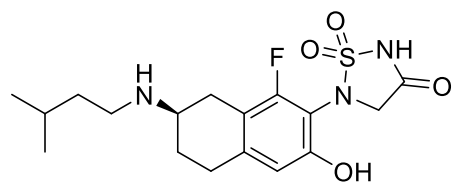

ABBV-CLS-484

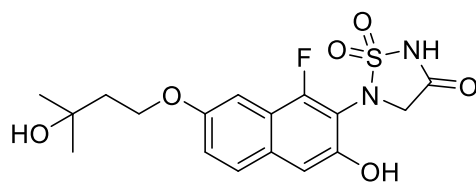

Compound 182

*Supplementary Fig. 1. The chemical structures of ABBV-CLS-484 and Compound 182.*

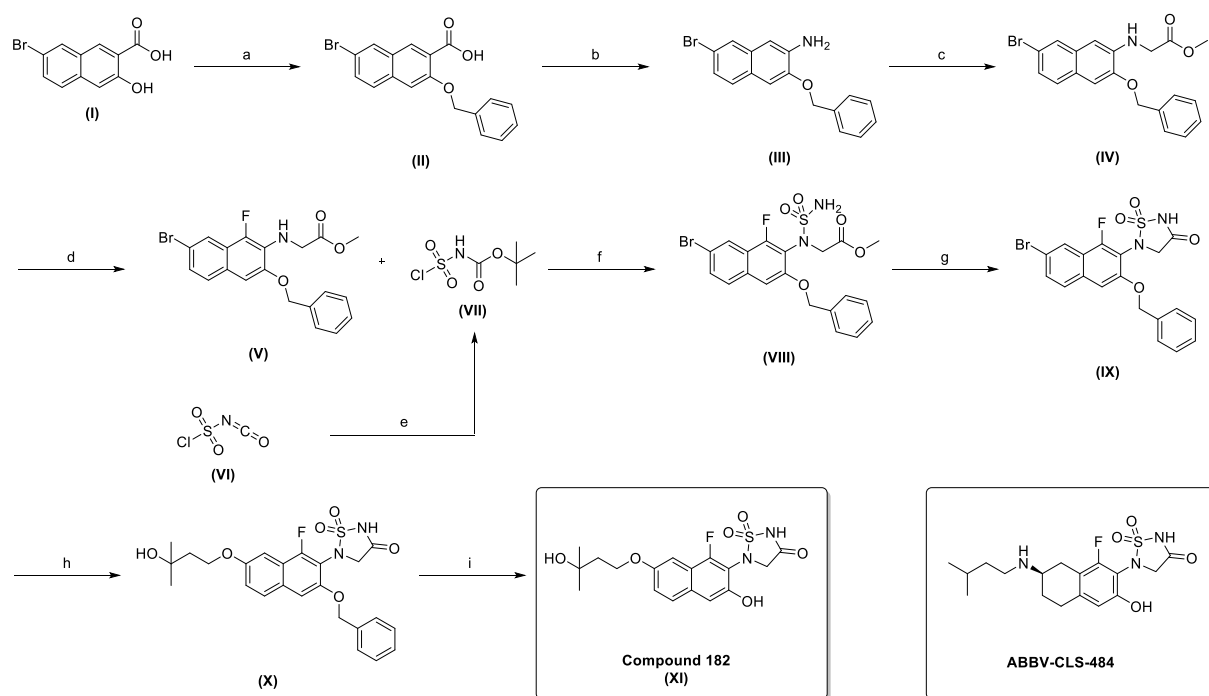

**Supplementary Fig. 2. Synthetic Scheme for Compound 182<sup>a</sup> and structure of clinical candidate ABBV-CLS-484.** <sup>a</sup>Reagents and conditions: (a) (i) Benzyl alcohol, Cs<sub>2</sub>CO<sub>3</sub>, DMF, r.t., 16 h, (ii) LiOH, MeOH/H<sub>2</sub>O, 70 °C, 16 h, 94% over 2 steps; (b) (i) diphenylphosphoryl azide, Et<sub>3</sub>N, *tert*-butanol / toluene, 80 °C, 16 h, (ii) diethylenetriamine, 130 °C, 16 h, 40% over 2 steps; (c) methyl 2-bromomethylacetate, K<sub>2</sub>CO<sub>3</sub>, 60 °C, 16 h, 77%; (d) NFSi, THF, r.t., 6 h, 62%; (e) *tert*-butanol, 0 °C, 1 h; (f) (i) Et<sub>3</sub>N, 0 °C – r.t., 2 h, (ii) TFA/CH<sub>2</sub>Cl<sub>2</sub>, r.t., 1 h, 71% over 2 steps; (g) *t*BuOK, THF, r.t., 1 h, 90%; (h) (i) RockPhos Pd G3, Cs<sub>2</sub>CO<sub>3</sub>, DMF, H<sub>2</sub>O, 80 °C, 3 h, (ii) 4-bromo-2-methylbutan-2-ol, Cs<sub>2</sub>CO<sub>3</sub>, r.t., 16 h, 53%; (i) H<sub>2</sub>, Pd/C, MeOH, r.t., 4 h, 64%.

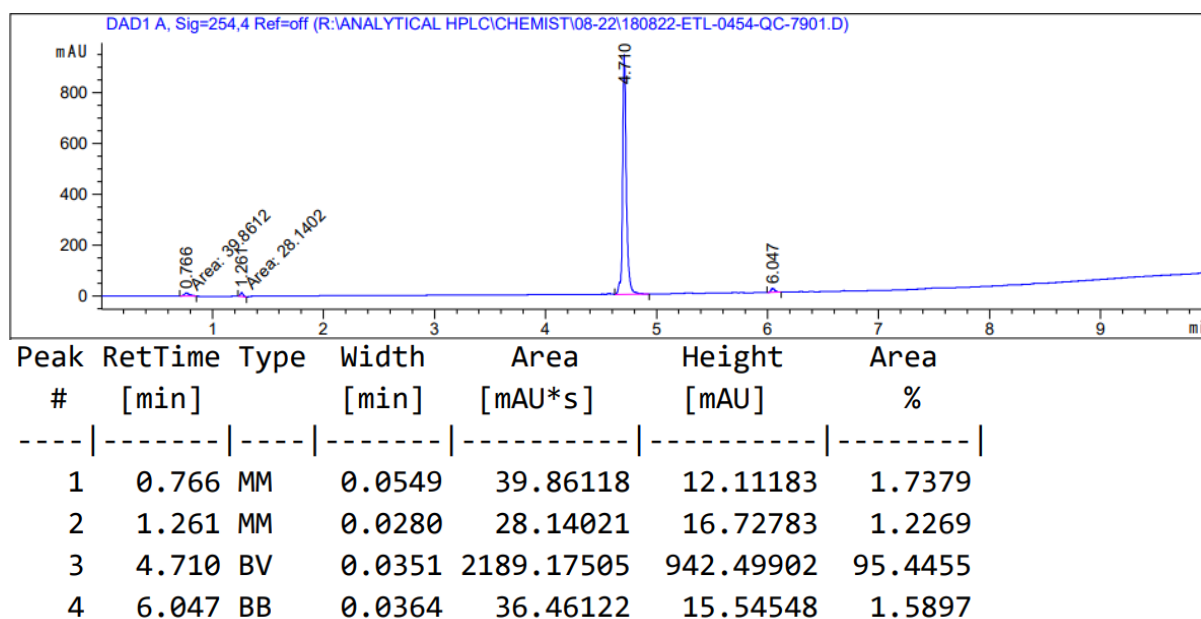

**Supplementary Fig. 3. HPLC Chromatogram of Compound 182 and Purity.** HPLC chromatogram of XI (Compound 182; absorbance measured at wavelength 254 nm) and purity measurement. The compound had a retention time of 4.710 min and a purity of 95% based on peak area (area under the curve).

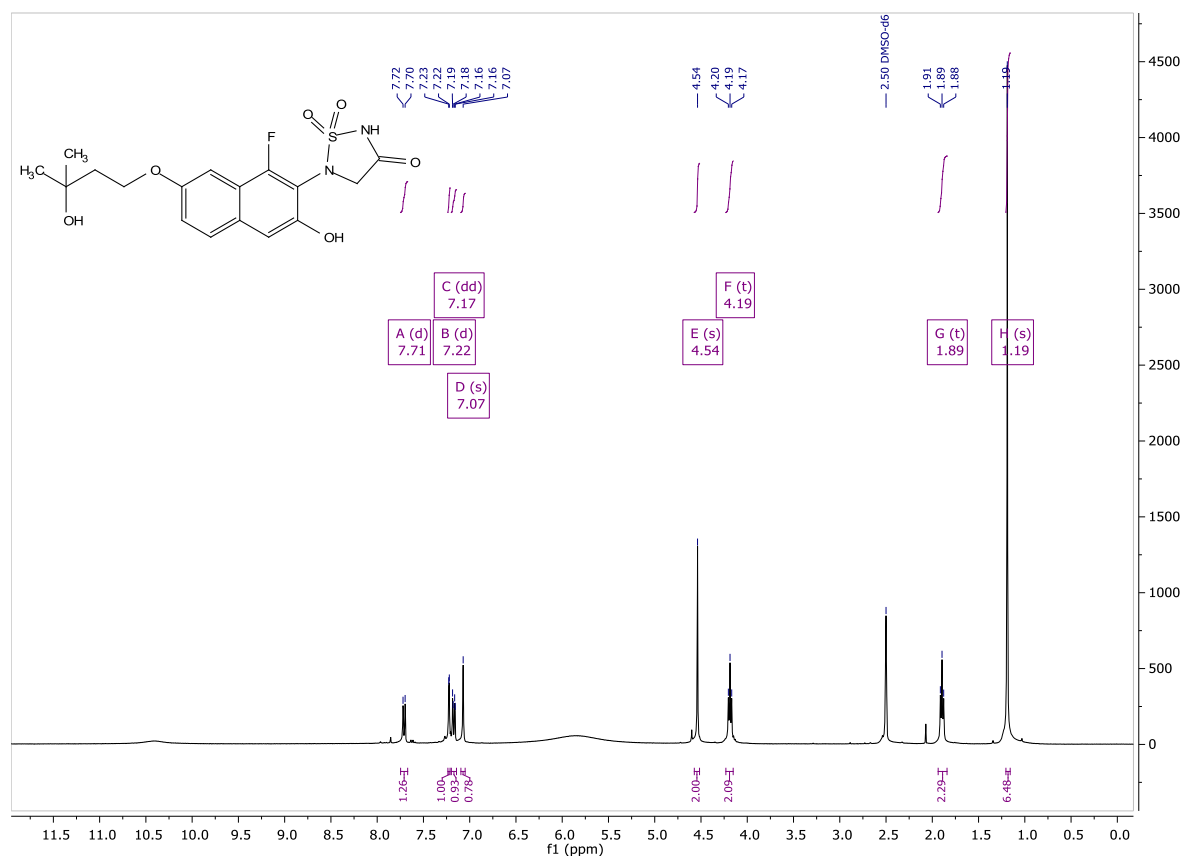

**Supplementary Fig. 4. <sup>1</sup>H NMR spectrum of Compound 182.** <sup>1</sup>H NMR spectrum of XI (Compound 182) obtained in deuterated DMSO-*d*<sub>6</sub> at 400 MHz.

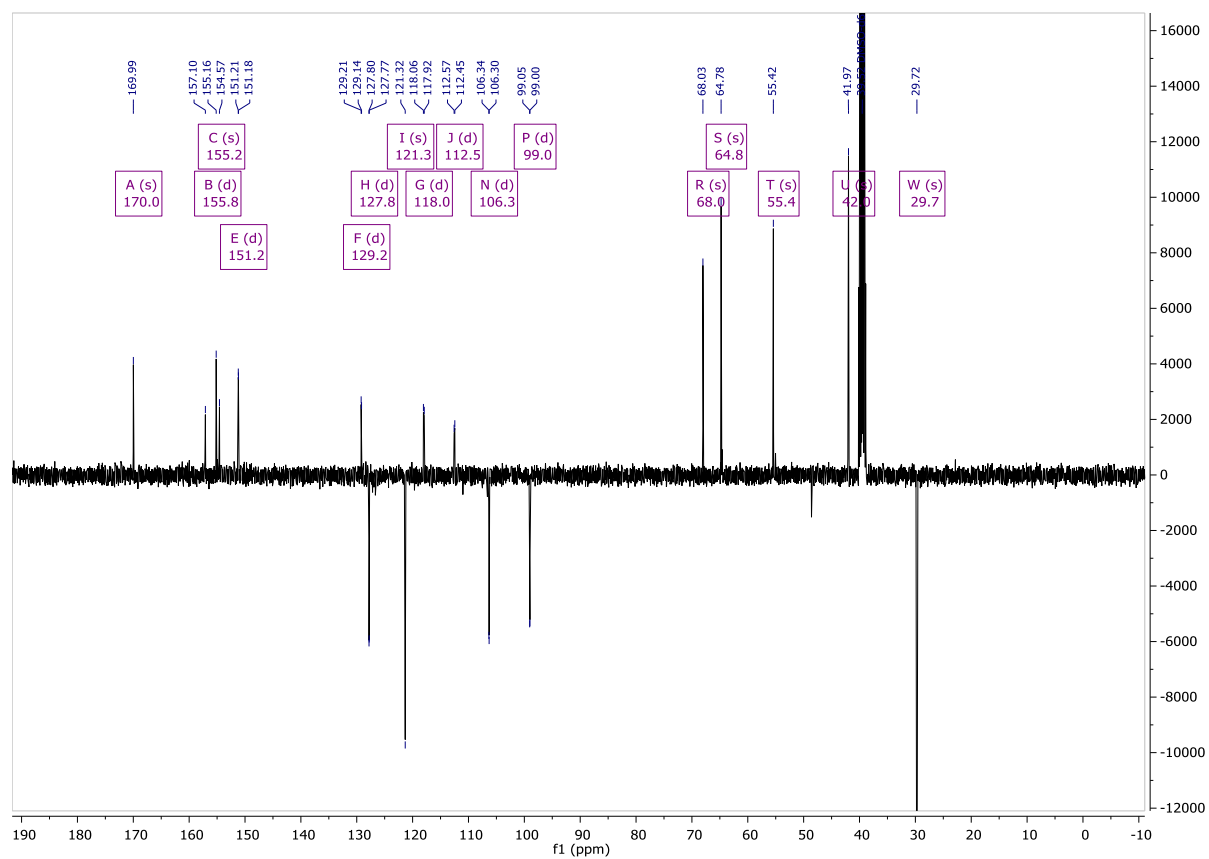

**Supplementary Fig. 5.**  $^{13}\text{C}$  NMR spectrum of Compound 182.  $^{13}\text{C}$ -DEPTQ NMR spectrum of XI (Compound 182) obtained in deuterated DMSO- $d_6$  at 101 MHz.

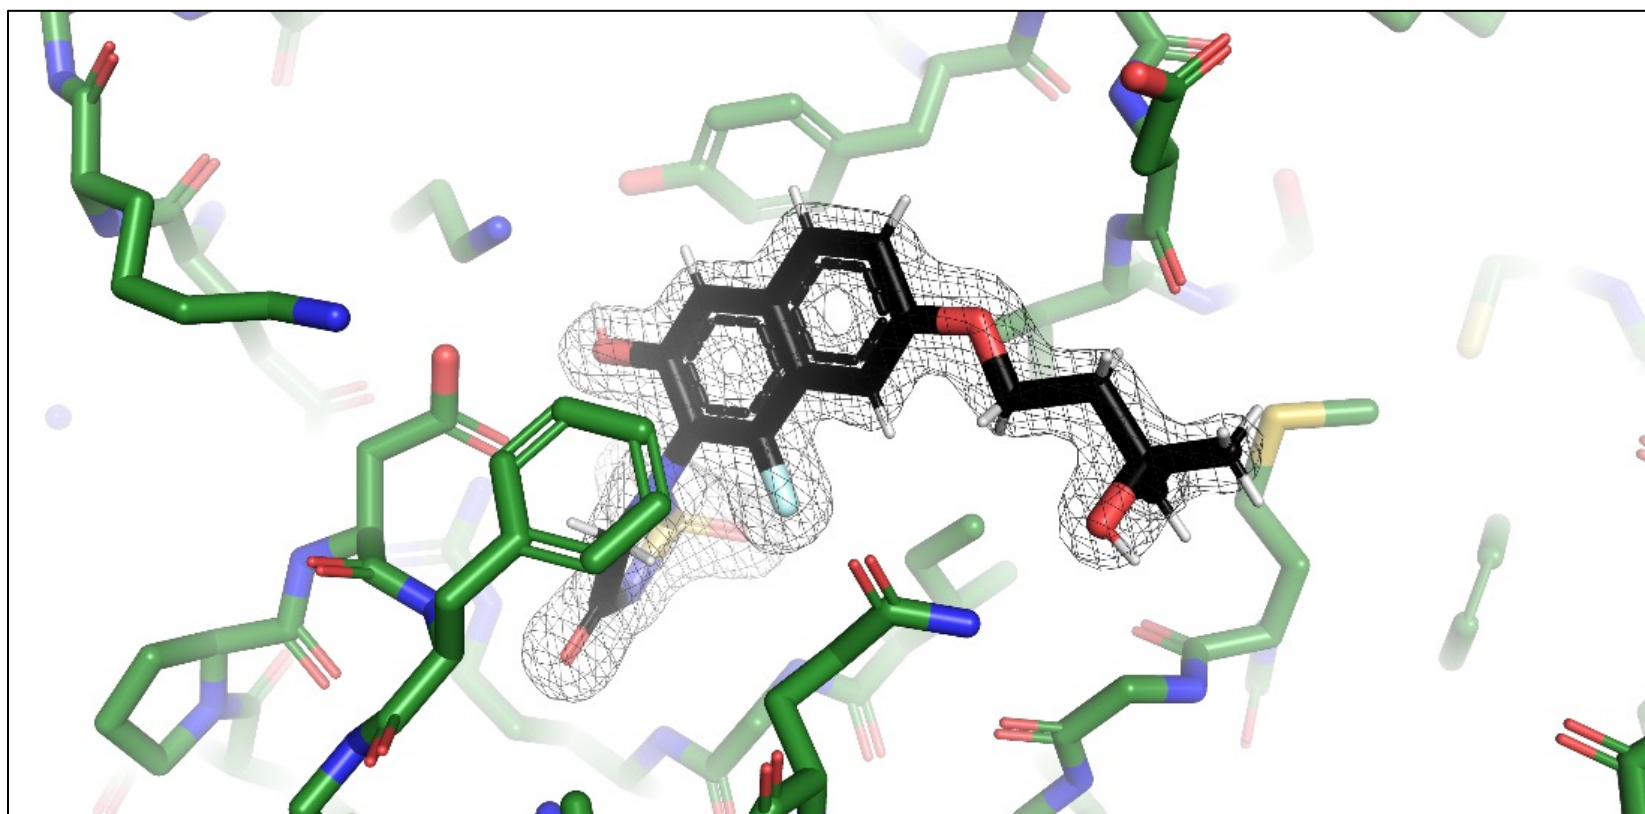

***Supplementary Fig. 6. Electron density for Compound 182.*** The region about the compound in the PTP1B/Compound 182 complex 2Fo-Fc electron density map is shown as a mesh and is contoured at  $2\sigma$ . See Table 2 for crystallographic details.

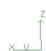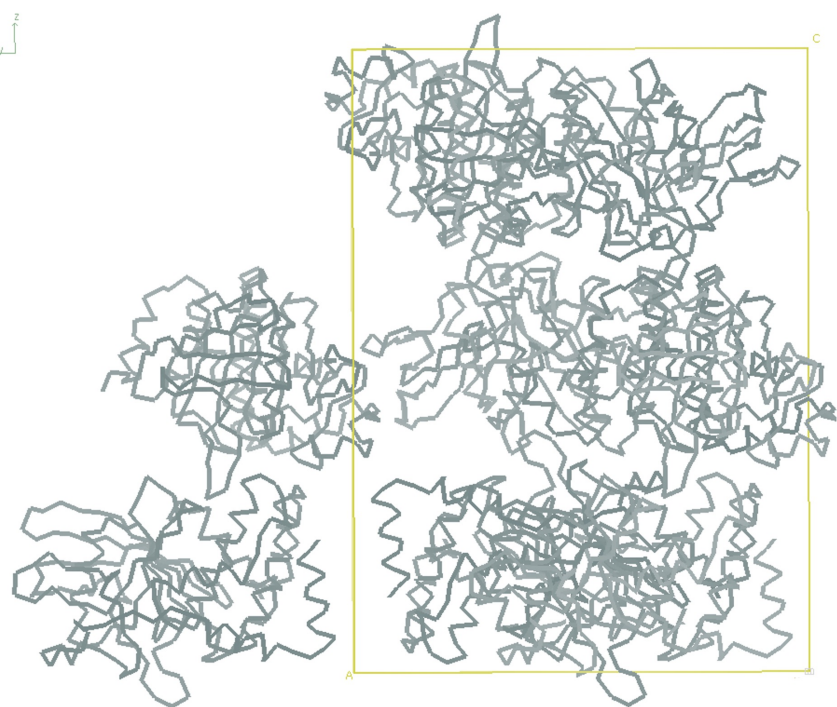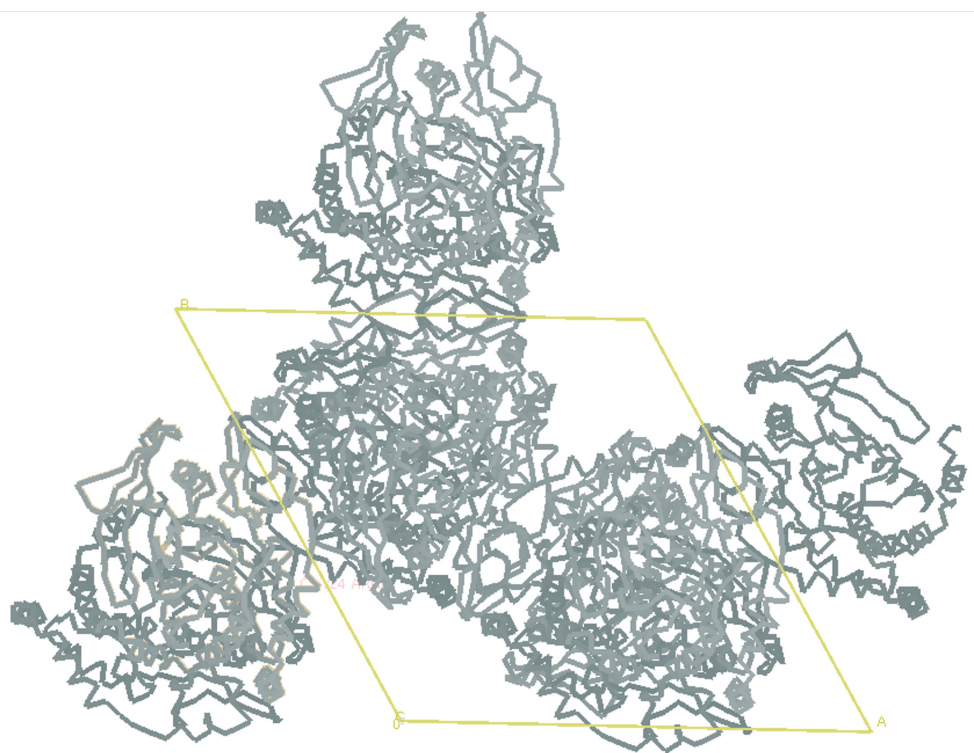

***Supplementary Fig. 7. PTP1B crystal structure.*** Example of the crystal lattice, with the asymmetric unit show in yellow.



**Supplementary Fig. 8. Administration of Compound 182 every three days represses tumor growth.** AT3-OVA mammary tumor cells were injected into the fourth inguinal mammary fat pads of 8 week-old C57BL/6 female mice. Mice were treated with Compound 182 (CMP-182; 10 mg/kg i.v.; n=5) or saline (n=5) on days (d) 9, 12, 15, 18, 21, 24 and 27 after tumor cell implantation. **a)** Tumor growth was monitored and tumor weights measured. **b)** Tumor-infiltrating lymphocytes or splenocytes including CD44<sup>hi</sup>CD62L<sup>hi</sup> CD8<sup>+</sup> and CD4<sup>+</sup> central/memory (CM) T cells and CD44<sup>hi</sup>CD62L<sup>lo</sup> CD8<sup>+</sup> and CD4<sup>+</sup> effector/memory (EM) T cells and CD4<sup>+</sup>CD25<sup>+</sup>FoxP3<sup>+</sup> regulatory T cells (T<sub>regs</sub>) were analysed by flow cytometry. **c)** Tumor-infiltrating T cells from (a) were assessed for intracellular granzyme B (GRZMB) and surface PD-1 and TIM-3 in unstimulated tumor-infiltrating CD8<sup>+</sup> T cells. In (a-c) representative results (means ± SEM) from at least two independent experiments are shown. Significance for tumor sizes in (a) was determined using a 2-way ANOVA Test and for tumor weights in (a) using a 2-tailed Mann-Whitney U Test. In (b-c) significances were determined using a 2-tailed Mann-Whitney U Test.

**a**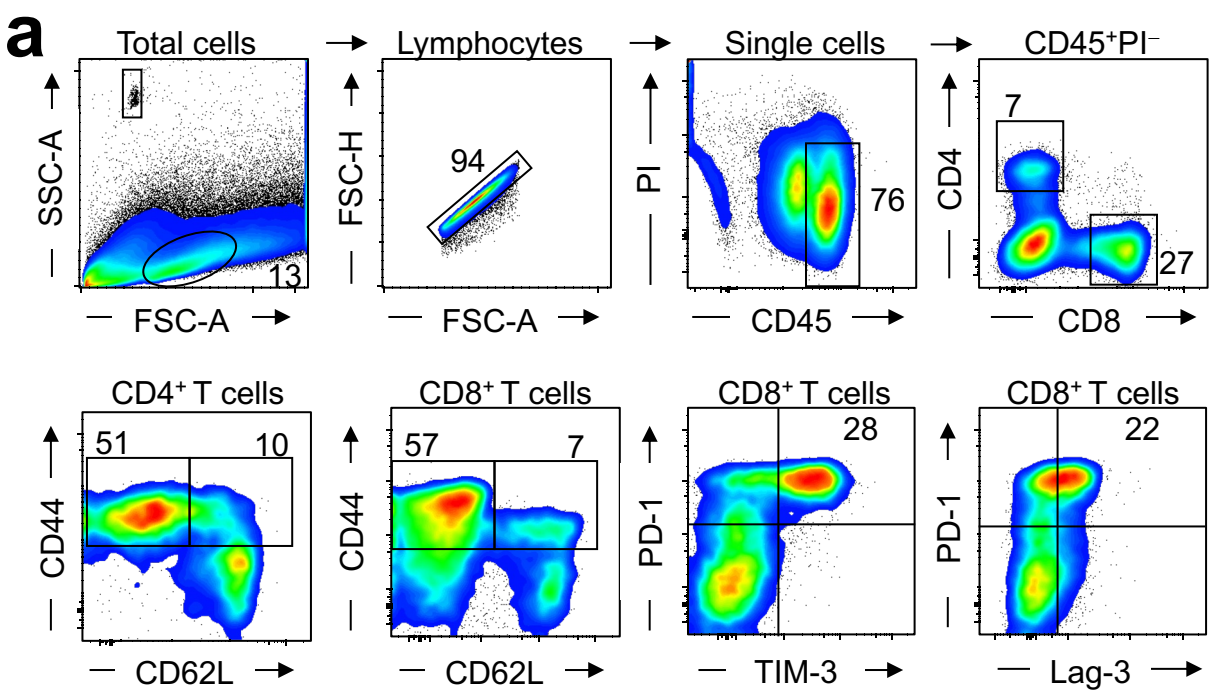**b**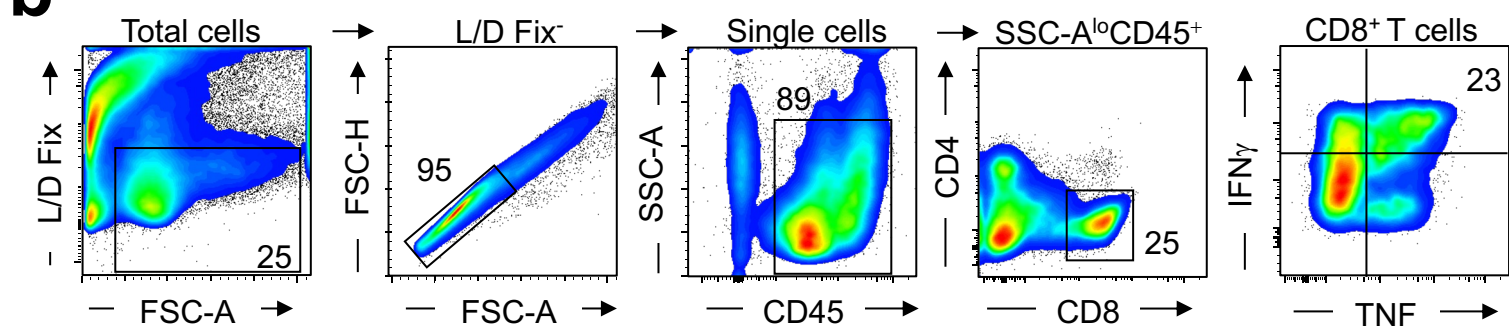**c**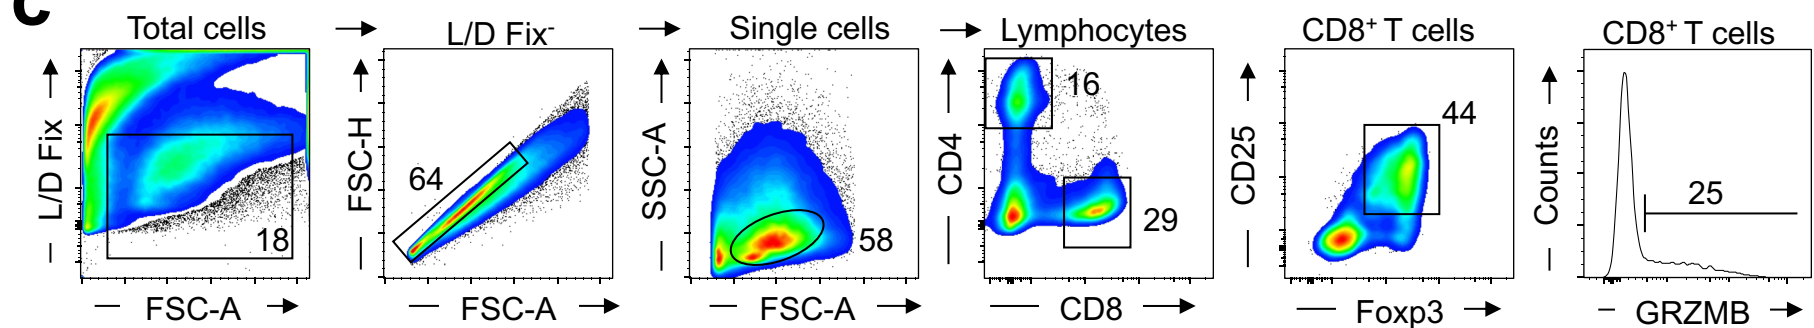**d**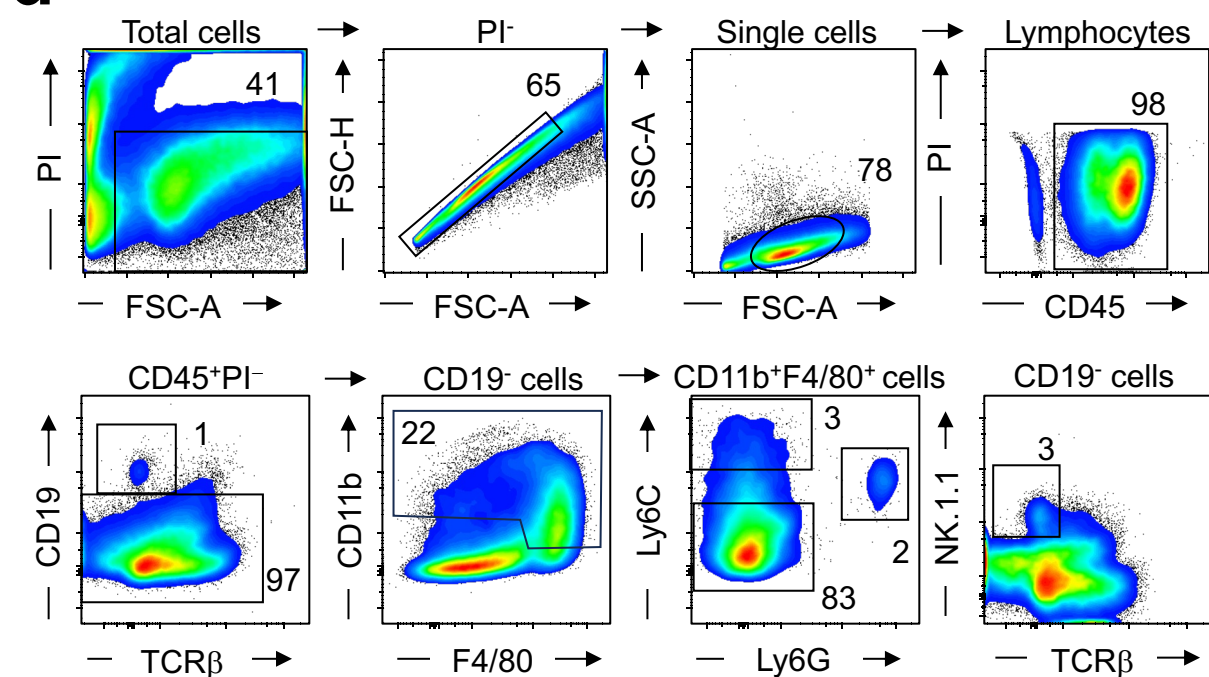

**Supplementary Fig. 9. Gating strategy for intratumoral lymphocytes.** AT3-OVA mammary tumor cells were injected into the fourth inguinal mammary fat pads of C57BL/6 mice. Mice were treated with Compound 182 (10 mg/kg i.v.) or saline on days (d) 6, 8, 10, 12, 14, 16, 18 and 21 after tumor cell implantation. **a)** Tumor-infiltrating lymphocytes were stained with fluorochrome-conjugated antibodies for CD4, CD8, CD44, CD45, CD62L, PD-1, Tim-3 and Lag-3. Live PI<sup>-</sup> (propidium iodide) CD45<sup>+</sup> single cells were gated for CD4<sup>+</sup> and CD8<sup>+</sup> T cells and the proportions of CD4<sup>+</sup> or CD8<sup>+</sup>CD44<sup>hi</sup>CD62L<sup>hi</sup> central/memory T cells and CD4<sup>+</sup> or CD8<sup>+</sup>CD44<sup>hi</sup>CD62L<sup>lo</sup> effector/memory T cells and exhausted CD8<sup>+</sup>PD-1<sup>hi</sup>TIM-3<sup>hi</sup> or CD8<sup>+</sup>PD-1<sup>hi</sup>Lag-3<sup>hi</sup> T cells were determined by flow cytometry. **b)** Tumor-infiltrating T cells were stimulated with PMA/Ionomycin in the presence of Golgi Stop/Plug and stained for CD4, CD8, CD45 and intracellular IFN- $\gamma$  and TNF. Live L/D Fix<sup>-</sup> (LIVE/DEAD<sup>®</sup> Fixable Near IR-stain) CD45<sup>+</sup> single cells were gated for CD8<sup>+</sup> T cells and the proportions of activated CD8<sup>+</sup>IFN- $\gamma$ <sup>+</sup>TNF<sup>+</sup> TILs were determined by flow cytometry. **c)** Tumor-infiltrating lymphocytes were stained with fluorochrome-conjugated antibodies for CD4, CD8, CD25 and intracellular FoxP3 and GRZMB. Live L/D Fix<sup>-</sup> (LIVE/DEAD<sup>®</sup> Fixable Near IR-stain) CD45<sup>+</sup> single cells were gated for CD4<sup>+</sup> and CD8<sup>+</sup> T cells and the proportions of CD4<sup>+</sup>CD25<sup>hi</sup>FoxP3<sup>+</sup> T<sub>regs</sub> and CD8<sup>+</sup>GRZMB<sup>+</sup> cytotoxic T cell were determined by flow cytometry. **d)** Tumor-infiltrating lymphocytes were stained with fluorochrome-conjugated antibodies for CD45, CD19, CD11b, F4/80, Ly6C, Ly6G, NK1.1 and TCR $\beta$ . Live PI<sup>-</sup> (propidium iodide) CD45<sup>+</sup> single cells were gated for CD19<sup>+</sup> and CD19<sup>-</sup> cells and proportions of CD19<sup>+</sup> B cells were determined by flow cytometry. CD19<sup>-</sup> cells were gated for CD11b<sup>hi/lo</sup> and F4/80<sup>hi/lo</sup> cells and the proportions of CD11b<sup>hi/lo</sup> F4/80<sup>hi/lo</sup> monocytic (Ly6G<sup>lo</sup>/Ly6C<sup>hi</sup>) and granulocytic (Ly6G<sup>hi</sup>/Ly6C<sup>hi</sup>) myeloid derived suppressor cells (MDSCs) and were determined by flow cytometry. In (a, d) cells were quantified with Flow-Count Fluorospheres<sup>®</sup> (Beads).

**a**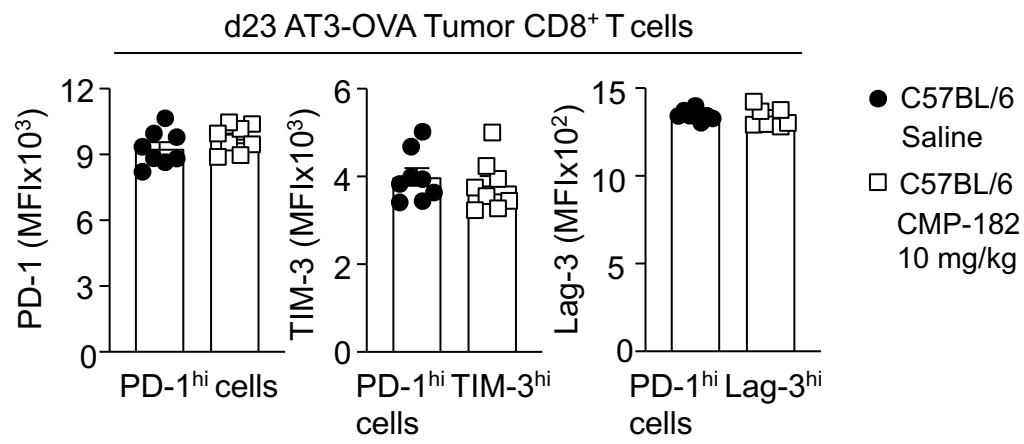**b**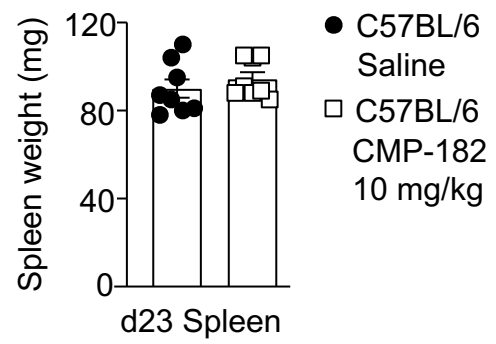**c**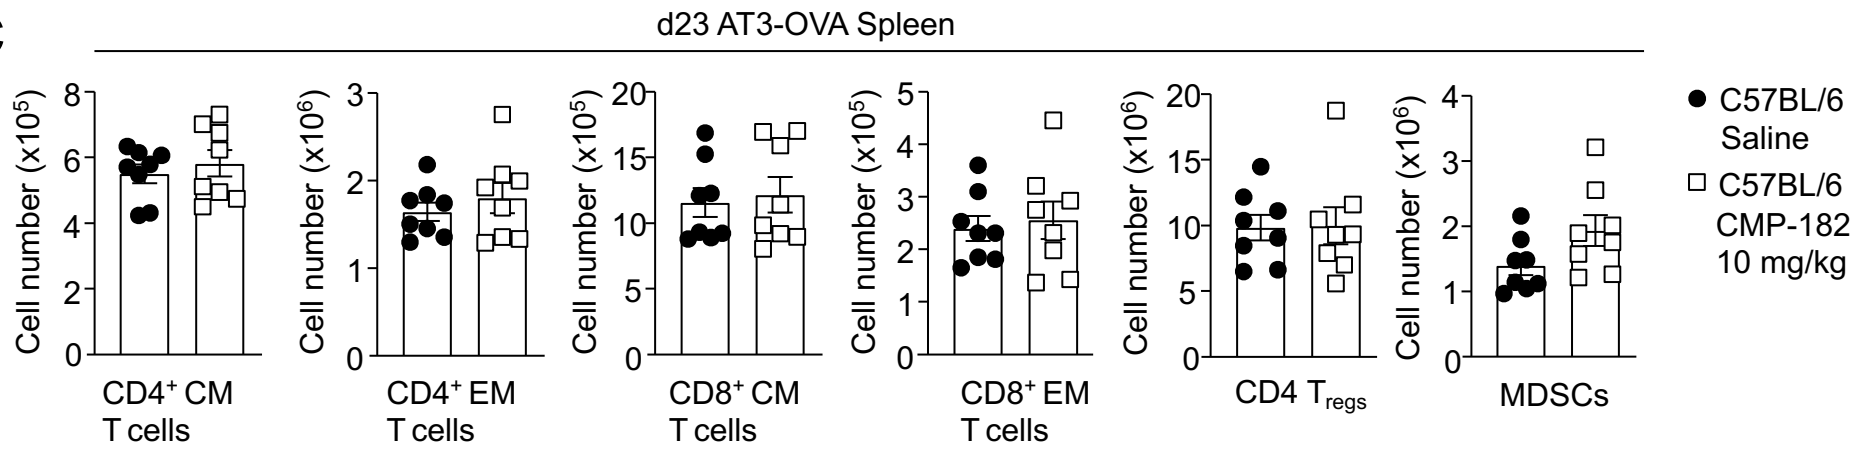**d**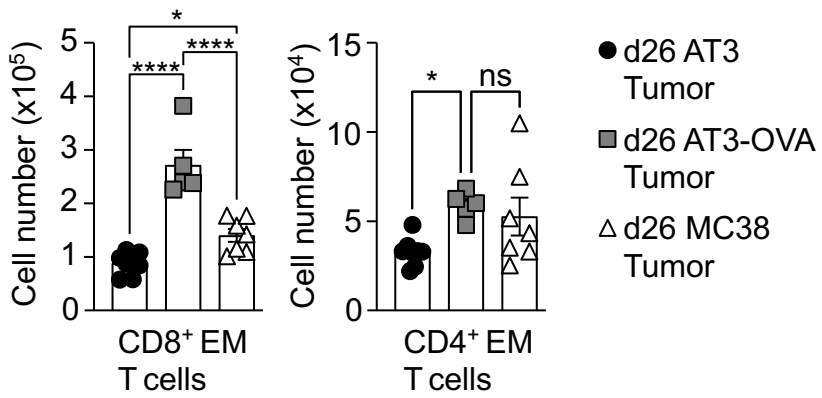

**Supplementary Fig. 10. Compound 182 does not affect splenic T cell numbers. a-c)** AT3-OVA mammary tumor cells were injected into the fourth inguinal mammary fat pads of 8 week-old C57BL/6 female mice. Mice were treated with Compound 182 (CMP-182; 10 mg/kg i.v.; n=8) or saline (n=8) on days (d) 6, 8, 10, 12, 14, 16, 18 and 21 after tumor cell implantation. **a)** PD-1, TIM-3 and Lag-3 mean fluorescence intensities (MFI) on PD-1, TIM-3 and Lag-3 on PD-1<sup>hi</sup> or PD-1<sup>hi</sup>TIM-3<sup>hi</sup> or PD-1<sup>hi</sup>Lag-3<sup>hi</sup> tumor-infiltrating CD8<sup>+</sup> T cells were analysed by flow cytometry. **b)** Spleen weights from mice in (a) were determined. **c)** Splenocytes from mice in (a) including CD44<sup>hi</sup>CD62L<sup>hi</sup> CD8<sup>+</sup> and CD4<sup>+</sup> central/memory (CM) T cells and CD44<sup>hi</sup>CD62L<sup>lo</sup> CD8<sup>+</sup> and CD4<sup>+</sup> effector/memory (EM) T cells, CD4<sup>+</sup>CD25<sup>+</sup>FoxP3<sup>+</sup> regulatory T cells (T<sub>regs</sub>) and granulocytic and monocytic CD11b<sup>+</sup>F4/80<sup>hi/lo</sup>Ly6C<sup>+</sup>Ly6G<sup>+/-</sup> (MDSCs) myeloid-derived suppressor cells were analysed by flow cytometry. **d)** AT3 (n=8) or AT3-OVA (n=5) mammary tumor cells were injected into the fourth inguinal mammary fat pads of 8 week-old C57BL/6 female mice or MC38 (n=7) colorectal tumor cells were xenografted into the flanks of 8 week-old C57BL/6 male mice. CD8<sup>+</sup> and CD4<sup>+</sup> EM T cells were analysed by flow cytometry. In (a-d) representative results (means ± SEM) from at least two independent experiments are shown. In (d) significances were determined using a 1-way ANOVA Test.

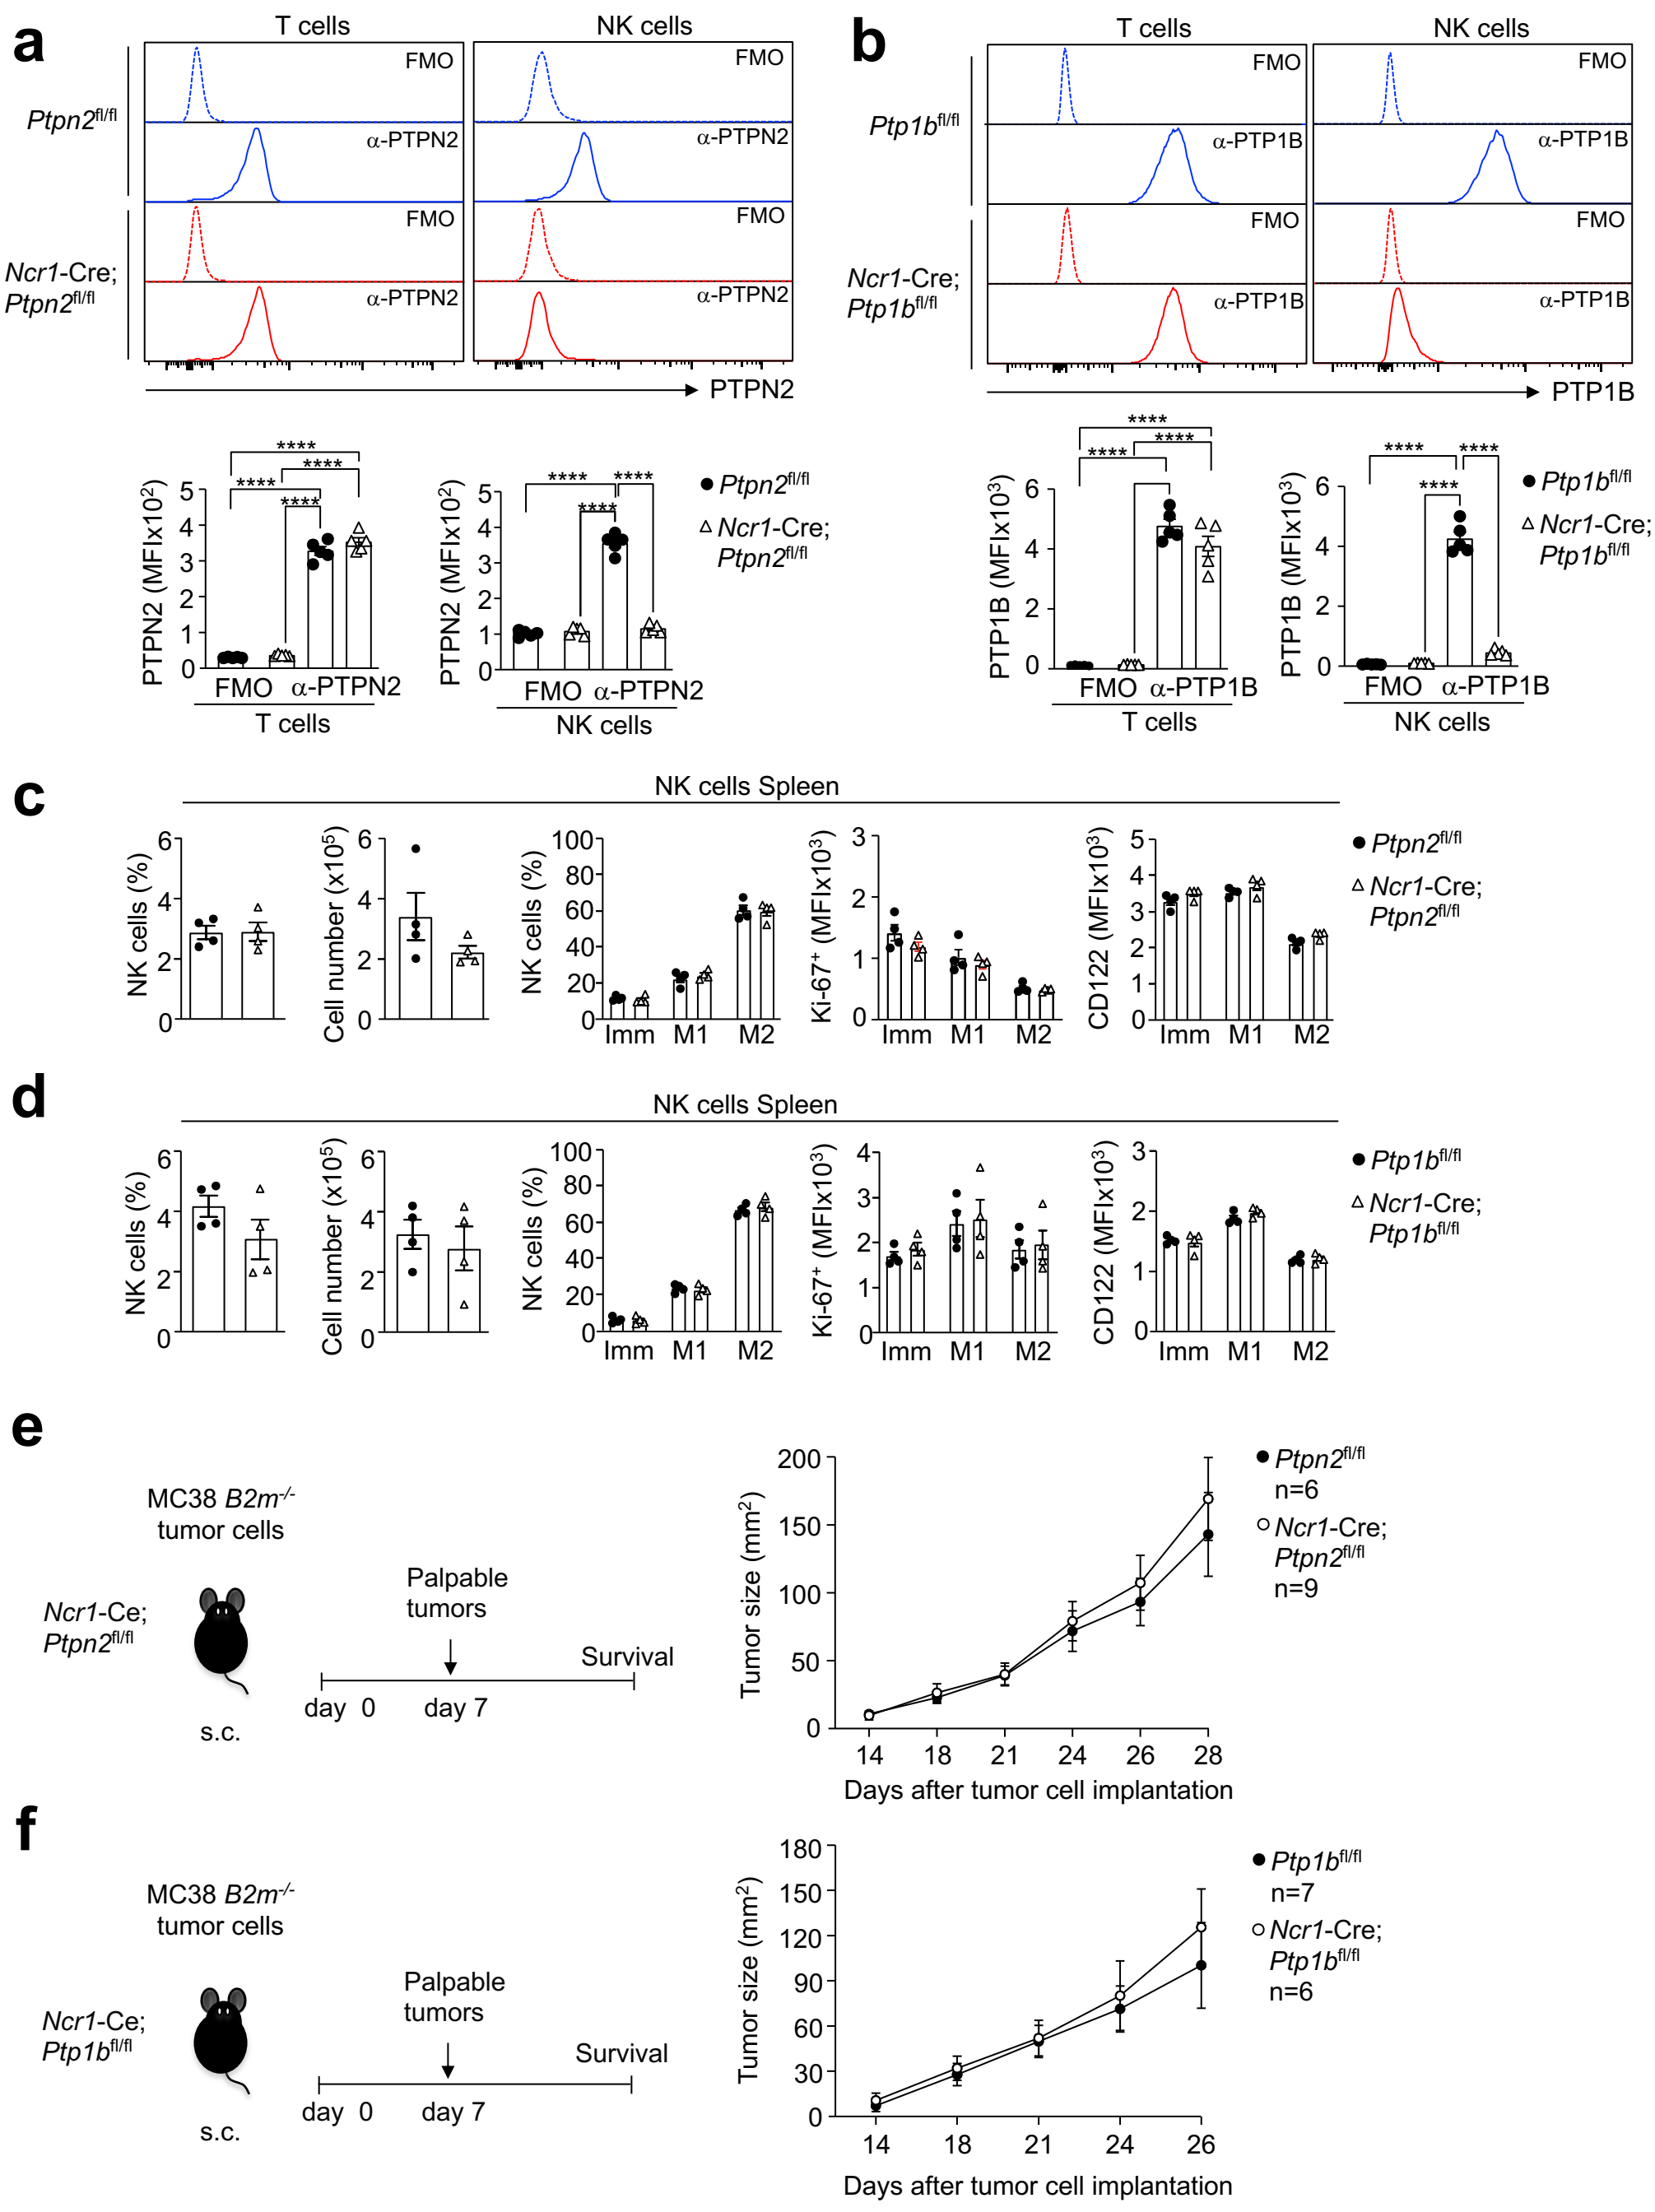

**Supplementary Fig. 11. NK cell-specific deletion of PTP1B or PTPN2 does not alter NK cell development and tumor growth.** **a-b)** Splenic CD3<sup>+</sup>CD19<sup>-</sup>CD49b<sup>-</sup>NK.1.1<sup>-</sup> T cells and CD3<sup>-</sup>CD19<sup>-</sup>CD49b<sup>hi</sup>NK.1.1<sup>hi</sup> NK cells from **a)** *Ptpn2*<sup>fl/fl</sup> (n=5) and *Ncr1*-Cre;*Ptpn2*<sup>fl/fl</sup> (n=5) or **b)** *Ptp1b*<sup>fl/fl</sup> (n=5) and *Ncr1*-Cre;*Ptp1b*<sup>fl/fl</sup> (n=5) C57BL/6 male mice were assessed for PTPN2 and PTP1B protein levels by flow cytometry; FMO staining is background staining. **c-d)** Proportions of NK cells (CD45<sup>+</sup>NK1.1<sup>+</sup>, CD49b<sup>+</sup>NKp46<sup>+</sup>CD3<sup>-</sup>TCRβ<sup>-</sup>CD19<sup>-</sup>F4/80<sup>-</sup>) from **c)** *Ptpn2*<sup>fl/fl</sup> (n=4) and *Ncr1*-Cre;*Ptpn2*<sup>fl/fl</sup> (n=4) or **d)** *Ptp1b*<sup>fl/fl</sup> (n=4) and *Ncr1*-Cre;*Ptp1b*<sup>fl/fl</sup> C57BL/6 male mice in each maturation subset [immature (Imm. CD27<sup>+</sup>, CD11b<sup>-</sup>), M1 (CD27<sup>+</sup>, CD11b<sup>+</sup>), M2 (CD27<sup>-</sup>, CD11b<sup>+</sup>)] and those staining for Ki67 (a marker of proliferation) or CD122 (IL2Rβ/IL15Rβ) were determined by flow cytometry. **e-f)** MC38 *B2m*<sup>-/-</sup> tumor cells were xenografted (subcutaneous; s.c) into the flanks of **e)** 8 week-old *Ptpn2*<sup>fl/fl</sup> (n=6) and *Ncr1*-Cre;*Ptpn2*<sup>fl/fl</sup> (n=9) C57BL/6 male mice, or **f)** 8 week-old *Ptp1b*<sup>fl/fl</sup> (n=7) and *Ncr1*-Cre;*Ptp1b*<sup>fl/fl</sup> (n=6) C57BL/6 male mice and tumor growth was monitored. In (a-f) representative results (means ± SEM) from at least two independent experiments are shown. In (a) significances were determined using a 1-way ANOVA Test.

**a**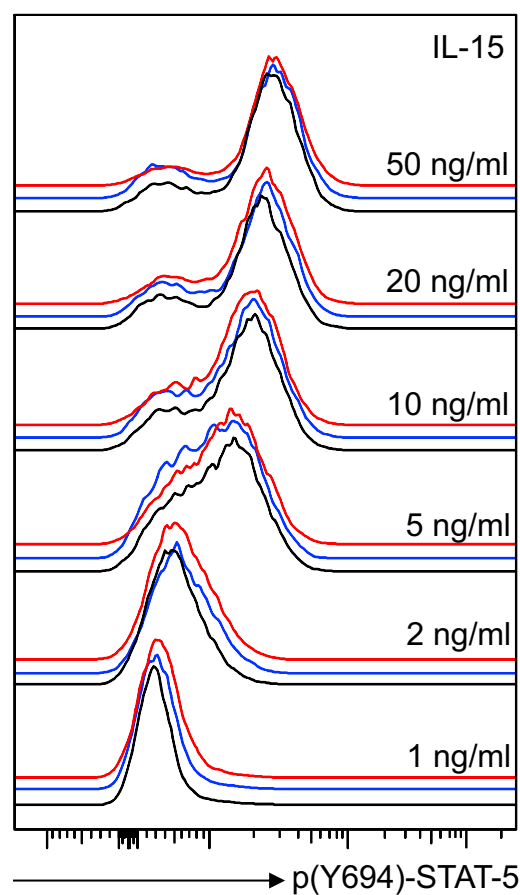

— DMSO  
— CMP-182  
[0.1 μM]  
— CMP-182  
[1 μM]

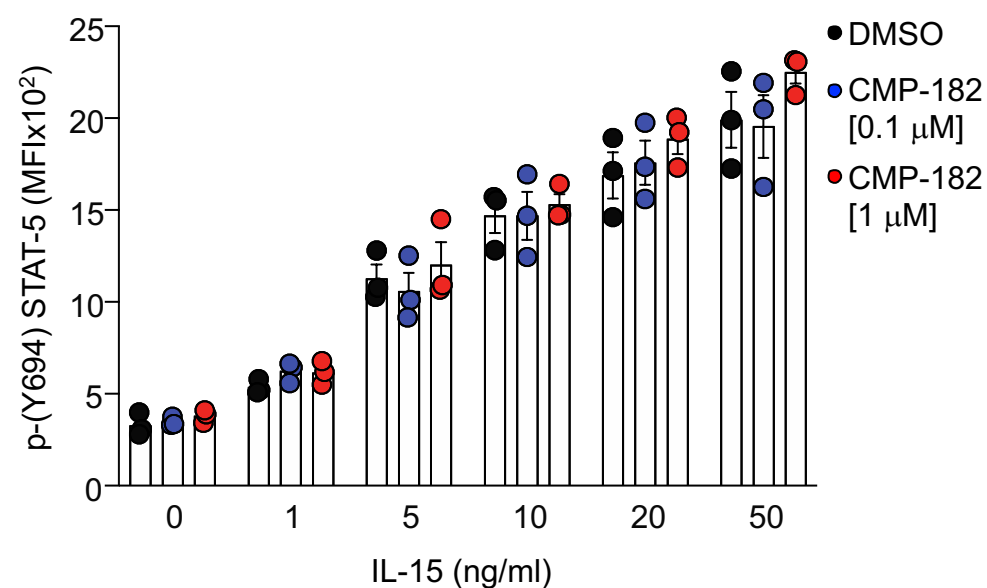**b**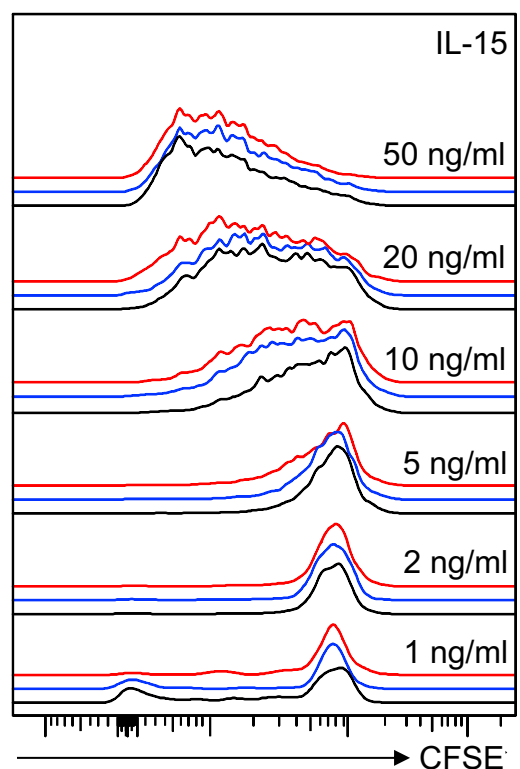

— DMSO  
— CMP-182  
[0.1 μM]  
— CMP-182  
[1 μM]

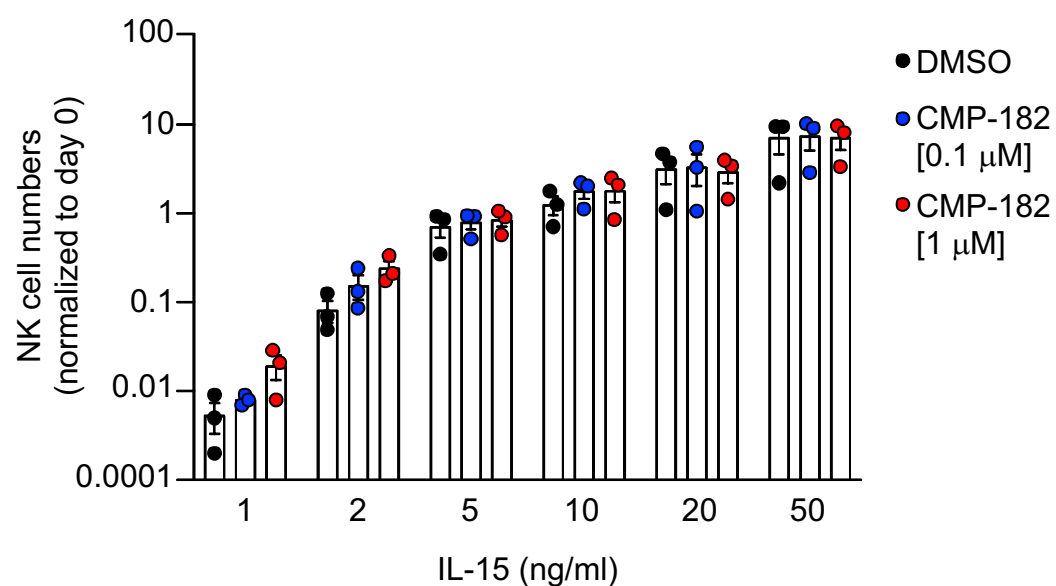**c**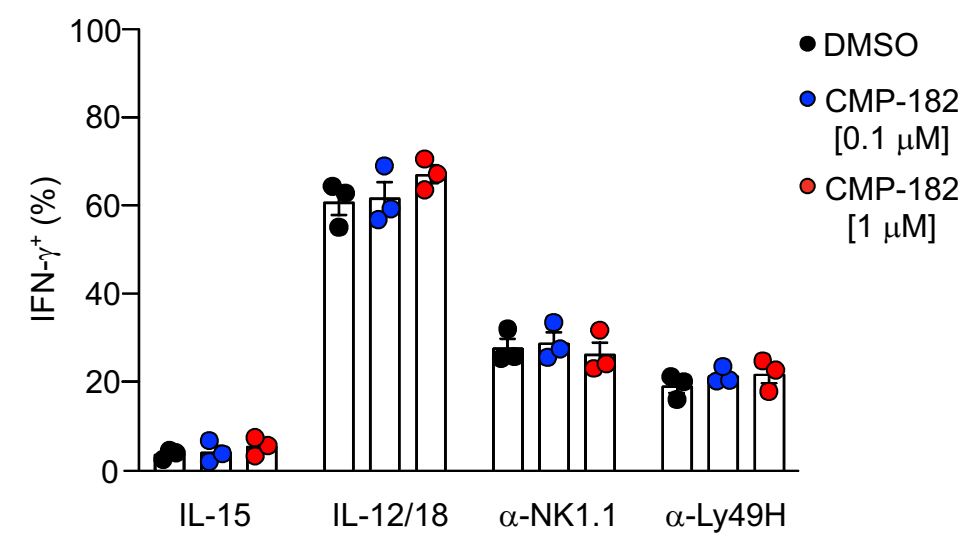**d**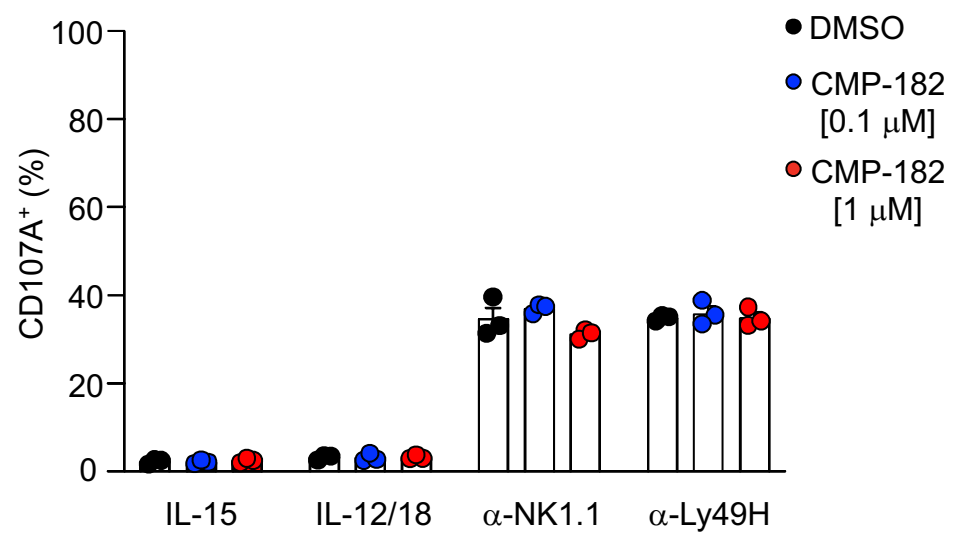

**Supplementary Fig. 12. Compound 182 does not enhance NK cell cytotoxicity and proliferation in vitro.** **a-b)** NK cells from C57BL/6 male mice (n=3 per group) were expanded *ex vivo* in the presence of IL-15 and then pre-treated with Compound 182 (CMP-182; 0.1 or 1 µg/ml) or vehicle (1% v/v DMSO) in the absence of IL-15. **a)** NK cells were re-stimulated for 15 min with the indicated amounts of IL-15 and Y694 phosphorylated STAT-5 (p-STAT-5) mean fluorescence intensities (MFIs) determined by flow cytometry. **b)** Alternatively, NK cells were stained with carboxyfluorescein succinimidyl ester (CFSE, Invitrogen) and then re-stimulated with the indicated amounts of IL-15 for 96 h and NK cell proliferation (CFSE dilution) monitored by flow cytometry. **c-d)** NK cells from C57BL/6 male mice (n=3 per group) were expanded *ex vivo* in the presence of IL-15 and then pre-treated with CMP-182 (0.1 or 1 µg/ml) or vehicle in the absence of IL-15. NK cells were re-stimulated with either IL-12 (10 ng/ml) or IL-18 (100 ng/ml) or with  $\alpha$ -NK1.1 or  $\alpha$ -Ly49H for 4 h. NK cells were maintained in 10 ng/ml IL-15 throughout the 4 h incubation time. Percentages of **c)** IFN- $\gamma$ <sup>+</sup> and **d)** CD107A<sup>+</sup> NK cells were determined by flow cytometry. In (a-d) results shown are means  $\pm$  SEM and are representative of at least two independent experiments.

**a**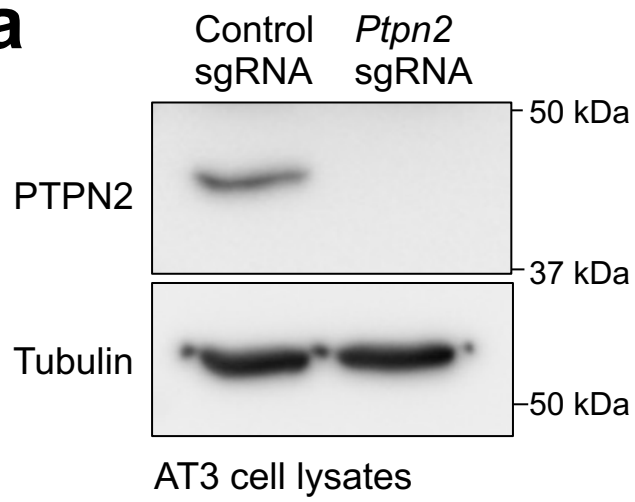**b**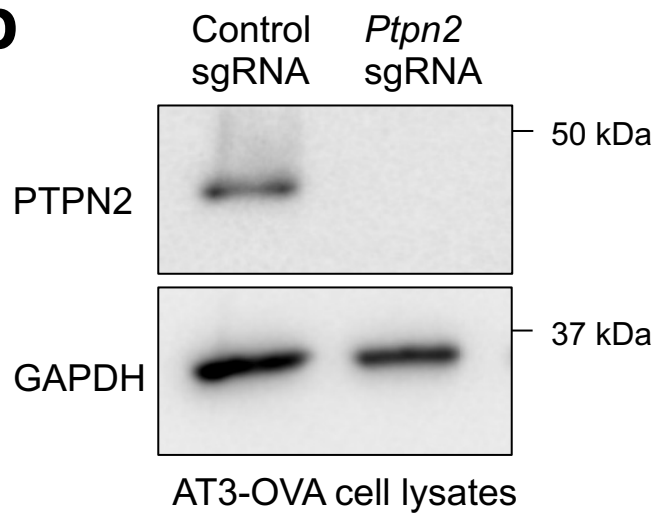

***Supplementary Fig. 13. CRISPR/Cas9-mediated PTPN2 deletion in AT3 and AT3-OVA tumor cells.*** PTPN2 was deleted in **a)** AT3 or **b)** AT3-OVA mammary tumor cells using control or *Ptpn2* sgRNAs and CRISPR RNP gene-editing. Cells were lysed and proteins resolved by SDS-PAGE and immunoblotted for PTPN2 (6F3) and re-probed for either tubulin or actin. Representative results from at least two independent experiments are shown.

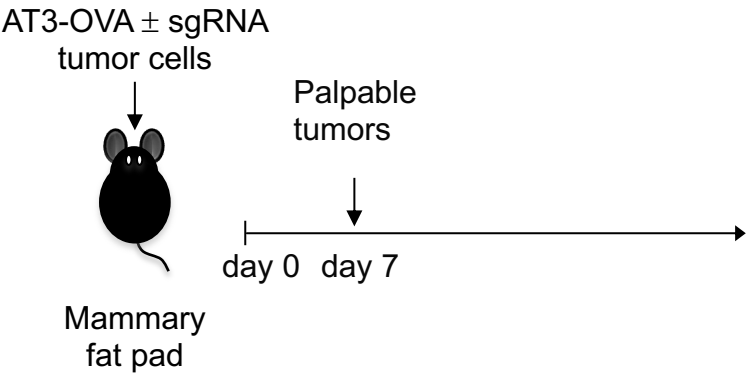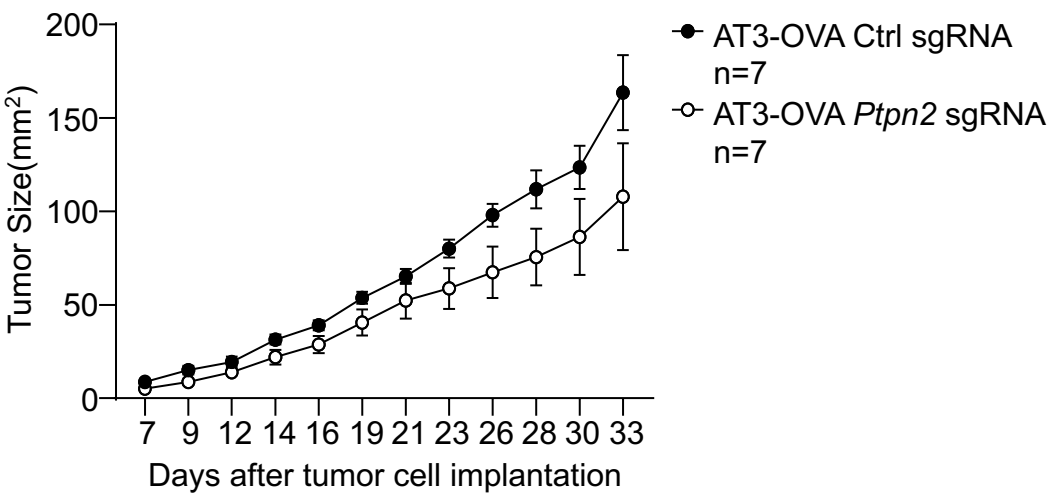

***Supplementary Fig. 14. PTPN2 deletion does not repress the growth of AT3-OVA mammary tumors.*** AT3-OVA control cells (Ctl sgRNA; n=7) or those in which PTPN2 had been deleted by CRISPR RNP (*Ptpn2* sgRNA; n=7) were injected into the fourth inguinal mammary fat pads of 8 week-old female C57BL/6 mice and tumor growth was monitored. Representative results (means  $\pm$  SEM) from at least two independent experiments are shown.

**a**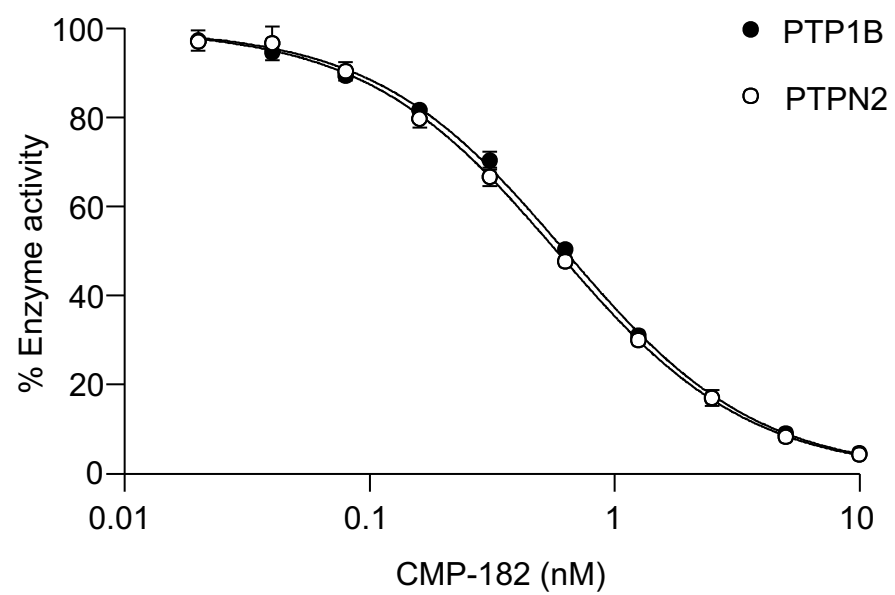**b**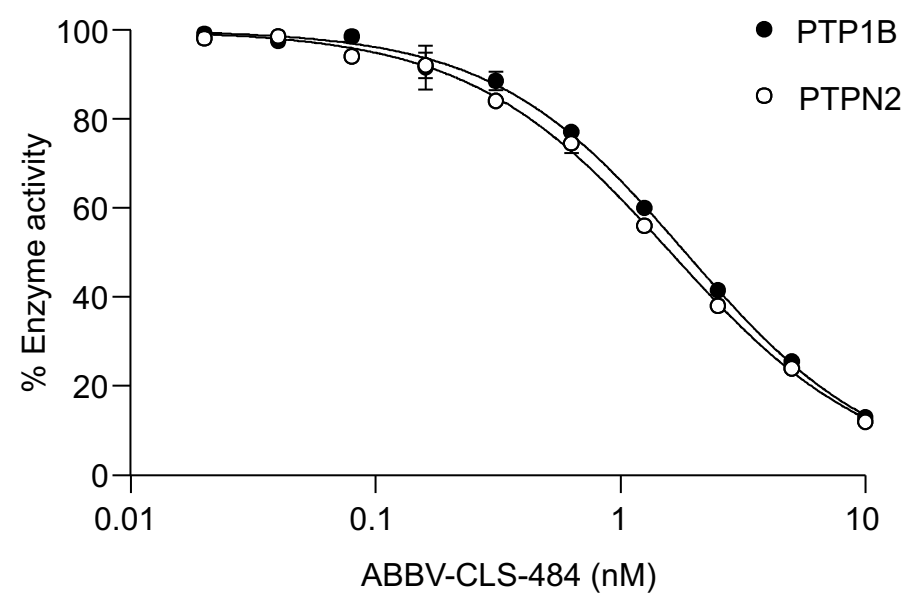

***Supplementary Fig. 15. Inhibition of PTP1B and PTPN2 by Compound 182 and ABBV-CLS-484.*** Effects of **a)** Compound 182 (CMP-182) versus **b)** ABBV-CLS-484 on PTP1B- and PTPN2-catalysed DiFMUP (10  $\mu$ M) hydrolysis. Results shown are means  $\pm$  SD and are representative of two independent experiments.
